# Supplementary material for: Sex Differences in the Associations of Obesity With Hypothyroidism and Thyroid Autoimmunity Among Chinese Adults
Source: PubMed Central journal article supplement (PMC6180185; doi:10.3389/fphys.2018.01397), 2018-10-04
Supplement: Table_1.pdf [file Table_1.pdf]

**Supplementary table 1 Risk of hypothyroidism and thyroid autoimmunity among obese individuals compared with non-obese individuals in the subgroup analyses by diabetes**

| Thyroid dysfunction              | Obese individuals | Non-obese controls | Crude OR               |             | Adjusted OR*     |      |  |
|----------------------------------|-------------------|--------------------|------------------------|-------------|------------------|------|--|
|                                  |                   |                    | OR(95%CI)              | P           | OR(95%CI)        | P    |  |
| <b>Non-diabetic participants</b> |                   |                    |                        |             |                  |      |  |
| Total                            | N = 310           | N = 2,129          |                        |             |                  |      |  |
| Hypothyroidism#                  | 39(12.6%)         | 263(12.3%)         | 1.02(0.71-1.46)        | 0.91        | 1.20(0.82-1.75)  | 0.34 |  |
| SCH                              | 37(11.9%)         | 242(11.4%)         | 1.06(0.73-1.53)        | 0.77        | 1.24(0.84-1.82)  | 0.28 |  |
| TAI                              | 33(10.6%)         | 278(13.1%)         | 0.79(0.54-1.16)        | 0.23        | 1.01(0.67-1.50)  | 0.97 |  |
| TPOAb positivity                 | 28(9.0%)          | 205(9.6%)          | 0.93(0.61-1.41)        | 0.74        | 1.14(0.74-1.76)  | 0.54 |  |
| TGAb positivity                  | 30(9.7%)          | 242(11.4%)         | 0.83(0.56-1.24)        | 0.38        | 1.14(0.75-1.74)  | 0.52 |  |
| Men                              | N = 201           | N = 970            |                        |             |                  |      |  |
| Hypothyroidism#                  | 15(7.5%)          | 88(9.1%)           | 0.81(0.45-1.43)        | 0.46        | 0.94(0.52-1.69)  | 0.83 |  |
| SCH                              | 14(6.9%)          | 85(8.7%)           | 0.78(0.43-1.40)        | 0.40        | 0.91(0.49-1.67)  | 0.76 |  |
| TAI                              | 15(7.5%)          | 71(7.3%)           | 1.02(0.57-1.82)        | 0.94        | 1.07(0.59-1.96)  | 0.81 |  |
| TPOAb positivity                 | 12(5.9%)          | 52(5.4%)           | 1.12(0.59-2.14)        | 0.73        | 1.19(0.60-2.34)  | 0.62 |  |
| TGAb positivity                  | 13(6.5%)          | 51(5.2%)           | 1.25(0.66-2.34)        | 0.49        | 1.28(0.66-2.48)  | 0.47 |  |
| Women                            | N = 109           | N = 1,159          |                        |             |                  |      |  |
| Hypothyroidism#                  | 24(22.0%)         | 175(15.1%)         | 1.59(0.98-2.57)        | 0.06        | 1.50(0.92-2.45)  | 0.10 |  |
| SCH                              | 23(21.1%)         | 157(13.5%)         | <b>1.71(1.04-2.78)</b> | <b>0.03</b> | 1.61(0.98-2.66)  | 0.06 |  |
| TAI                              | 18(16.5%)         | 207(17.9%)         | 0.91(0.54-1.54)        | 0.72        | 0.96(0.56-1.65)  | 0.89 |  |
| TPOAb positivity                 | 16(14.7%)         | 153(13.2%)         | 1.13(0.65-1.97)        | 0.66        | 1.13(0.64-1.99)  | 0.67 |  |
| TGAb positivity                  | 17(15.6%)         | 191(16.5%)         | 0.94(0.54-1.61)        | 0.81        | 1.04(0.60-1.81)  | 0.88 |  |
| <b>Diabetic participants</b>     |                   |                    |                        |             |                  |      |  |
| Total                            | N = 87            | N = 282            |                        |             |                  |      |  |
| Hypothyroidism#                  | 16(18.4%)         | 36(12.8%)          | 1.54(0.81-2.94)        | 0.19        | 1.49(0.76-2.91)  | 0.24 |  |
| SCH                              | 16(18.4%)         | 31(11.0%)          | 1.82(0.94-3.52)        | 0.07        | 1.79(0.91-3.55)  | 0.09 |  |
| TAI                              | 16(18.4%)         | 32(11.3%)          | 1.76(0.91-3.39)        | 0.09        | 1.77(0.89-3.51)  | 0.10 |  |
| TPOAb positivity                 | 10(11.5%)         | 23(8.1%)           | 1.46(0.67-3.20)        | 0.34        | 1.39(0.62-3.12)  | 0.41 |  |
| TGAb positivity                  | 12(13.8%)         | 24(8.5%)           | 1.72(0.82-3.60)        | 0.15        | 1.93(0.87-4.23)  | 0.10 |  |
| Men                              | N = 51            | N = 157            |                        |             |                  |      |  |
| Hypothyroidism#                  | 7(13.7%)          | 18(11.5%)          | 1.23(0.48-3.13)        | 0.67        | 1.13(0.42-3.06)  | 0.80 |  |
| SCH                              | 7(13.7%)          | 16(10.2%)          | 1.40(0.54-3.63)        | 0.48        | 1.35(0.49-3.68)  | 0.56 |  |
| TAI                              | 7(13.7%)          | 12(7.6%)           | 1.92(0.71-5.18)        | 0.19        | 1.69(0.59-4.80)  | 0.32 |  |
| TPOAb positivity                 | 4(7.8%)           | 10(6.4%)           | 1.25(0.37-4.17)        | 0.72        | 1.04(0.29-3.73)  | 0.95 |  |
| TGAb positivity                  | 4(7.8%)           | 5(3.2%)            | 2.58(0.67-10.03)       | 0.17        | 2.43(0.56-10.43) | 0.23 |  |
| Women                            | N = 36            | N = 125            |                        |             |                  |      |  |
| Hypothyroidism#                  | 9(25.0%)          | 18(14.4%)          | 1.98(0.80-4.89)        | 0.14        | 1.95(0.77-4.93)  | 0.16 |  |
| SCH                              | 9(25.0%)          | 15(12.0%)          | 2.44(0.96-6.18)        | 0.06        | 2.36(0.90-6.16)  | 0.08 |  |
| TAI                              | 9(25.0%)          | 20(16.0%)          | 1.75(0.72-4.27)        | 0.22        | 1.91(0.76-4.78)  | 0.17 |  |
| TPOAb positivity                 | 6(16.7%)          | 13(10.4%)          | 1.72(0.60-4.91)        | 0.31        | 1.75(0.59-5.16)  | 0.31 |  |
| TGAb positivity                  | 8(22.2%)          | 19(15.2%)          | 1.59(0.63-4.02)        | 0.32        | 1.81(0.69-4.71)  | 0.22 |  |

(\*Confounding factors in the multiple logistic regression analysis included age, sex, smoking, diabetes, hypertension, salt type and urinary iodine concentration. #Hypothyroidism included SCH and overt hypothyroidism. OR, odds ratio; 95%CI, 95% confidence interval.)
