# Supplementary material for: Sex Differences in the Associations of Obesity With Hypothyroidism and Thyroid Autoimmunity Among Chinese Adults
Source: PubMed Central journal article supplement (PMC6180185; doi:10.3389/fphys.2018.01397), 2018-10-04
Supplement: Table_2.pdf [file Table_2.pdf]

**Supplementary table 2 Correlations between BMI and thyroid autoimmunity in the subgroup analyses by sex or age**

| Outcomes                         | Spearman's correlation analysis |              | Univariate linear regression analysis |              | Multiple linear regression analysis |              |
|----------------------------------|---------------------------------|--------------|---------------------------------------|--------------|-------------------------------------|--------------|
|                                  | r(SE)                           | P value      | $\beta$ (SE)                          | P value      | $\beta$ (SE)                        | P value      |
| <b>Ages &lt;65 years</b>         |                                 |              |                                       |              |                                     |              |
| <b>Total</b>                     |                                 |              |                                       |              |                                     |              |
| TPOAb                            | 0.015(0.021)                    | 0.447        | -0.003(0.007)                         | 0.657        | 0.004(0.008)                        | 0.599        |
| TGAb                             | -0.035(0.021)                   | 0.075        | <b>-0.021(0.007)</b>                  | <b>0.005</b> | -0.003(0.008)                       | 0.711        |
| <b>Men</b>                       |                                 |              |                                       |              |                                     |              |
| TPOAb                            | 0.041(0.029)                    | 0.146        | 0.014(0.007)                          | 0.054        | 0.012(0.008)                        | 0.144        |
| TGAb                             | 0.018(0.029)                    | 0.514        | 0.009(0.007)                          | 0.232        | 0.009(0.008)                        | 0.227        |
| <b>Women</b>                     |                                 |              |                                       |              |                                     |              |
| TPOAb                            | 0.022(0.029)                    | 0.435        | -0.001(0.013)                         | 0.921        | -0.005(0.014)                       | 0.720        |
| TGAb                             | <b>-0.057(0.029)</b>            | <b>0.042</b> | <b>-0.028(0.013)</b>                  | <b>0.034</b> | -0.019(0.014)                       | 0.169        |
| <b>Ages ≥65 years</b>            |                                 |              |                                       |              |                                     |              |
| <b>Total</b>                     |                                 |              |                                       |              |                                     |              |
| TPOAb                            | 0.098(0.058)                    | 0.082        | 0.028(0.024)                          | 0.244        | 0.025(0.024)                        | 0.306        |
| TGAb                             | 0.054(0.058)                    | 0.337        | 0.001(0.024)                          | 0.989        | -0.005(0.024)                       | 0.846        |
| <b>Men</b>                       |                                 |              |                                       |              |                                     |              |
| TPOAb                            | <b>0.197(0.082)</b>             | <b>0.013</b> | 0.046(0.025)                          | 0.061        | <b>0.053(0.025)</b>                 | <b>0.040</b> |
| TGAb                             | 0.116(0.082)                    | 0.149        | 0.005(0.030)                          | 0.864        | 0.007(0.031)                        | 0.830        |
| <b>Women</b>                     |                                 |              |                                       |              |                                     |              |
| TPOAb                            | 0.007(0.082)                    | 0.928        | 0.007(0.040)                          | 0.861        | 0.006(0.042)                        | 0.887        |
| TGAb                             | -0.008(0.082)                   | 0.920        | -0.007(0.036)                         | 0.848        | -0.008(0.038)                       | 0.824        |
| <b>Diabetic participants</b>     |                                 |              |                                       |              |                                     |              |
| <b>Total</b>                     |                                 |              |                                       |              |                                     |              |
| TPOAb                            | <b>0.126(0.053)</b>             | <b>0.015</b> | <b>0.041(0.017)</b>                   | <b>0.019</b> | <b>0.039(0.018)</b>                 | <b>0.024</b> |
| TGAb                             | <b>0.124(0.053)</b>             | <b>0.017</b> | 0.023(0.017)                          | 0.190        | 0.021(0.018)                        | 0.235        |
| <b>Men</b>                       |                                 |              |                                       |              |                                     |              |
| TPOAb                            | 0.126(0.072)                    | 0.068        | <b>0.041(0.017)</b>                   | <b>0.017</b> | <b>0.045(0.018)</b>                 | <b>0.012</b> |
| TGAb                             | <b>0.172(0.072)</b>             | <b>0.013</b> | <b>0.025(0.012)</b>                   | <b>0.044</b> | 0.026(0.013)                        | 0.051        |
| <b>Women</b>                     |                                 |              |                                       |              |                                     |              |
| TPOAb                            | 0.137(0.081)                    | 0.084        | 0.040(0.032)                          | 0.211        | 0.035(0.033)                        | 0.289        |
| TGAb                             | 0.070(0.081)                    | 0.378        | 0.021(0.036)                          | 0.560        | 0.019(0.037)                        | 0.613        |
| <b>Non-diabetic participants</b> |                                 |              |                                       |              |                                     |              |
| <b>Total</b>                     |                                 |              |                                       |              |                                     |              |
| TPOAb                            | 0.018(0.021)                    | 0.361        | -0.003(0.008)                         | 0.663        | 0.001(0.008)                        | 0.919        |
| TGAb                             | -0.035(0.021)                   | 0.080        | <b>-0.022(0.008)</b>                  | <b>0.004</b> | -0.008(0.008)                       | 0.316        |
| <b>Men</b>                       |                                 |              |                                       |              |                                     |              |
| TPOAb                            | 0.054(0.030)                    | 0.065        | 0.014(0.008)                          | 0.079        | 0.011(0.008)                        | 0.194        |
| TGAb                             | 0.023(0.030)                    | 0.435        | 0.008(0.008)                          | 0.338        | 0.007(0.009)                        | 0.443        |
| <b>Women</b>                     |                                 |              |                                       |              |                                     |              |
| TPOAb                            | 0.012(0.029)                    | 0.666        | -0.001(0.013)                         | 0.977        | -0.011(0.014)                       | 0.451        |
| TGAb                             | <b>-0.061(0.029)</b>            | <b>0.029</b> | <b>-0.034(0.013)</b>                  | <b>0.014</b> | -0.026(0.014)                       | 0.075        |

(Values of thyroid antibodies were nonnormally distributed, and were log<sub>2</sub>-transformed in the linear regression analysis. SE, standard error.)
